# Supplementary material for: Improving estimates of district HIV prevalence and burden in South Africa using small area estimation techniques
Source: PubMed Central journal article supplement (PMC6386240; doi:10.1371/journal.pone.0212445), 2019-02-22
Supplement: pone.0212445.s001.pdf [file pone.0212445.s001.pdf]

## Model Description

### Improving estimates of district HIV prevalence and burden in South Africa using small area estimation techniques

Let  $\bar{y}_i$  denote the conventional design-based (direct) domain estimate of the mean some quantity from small area  $i, i = 1, \dots, m$ , and let  $\sigma_i^2$  denote the associated variance of  $\bar{y}_i$ . Under design-based sampling theory,

$$\bar{y}_i = \theta_i + \epsilon_i$$

where  $\theta_i$  is the true but unknown quantity estimated by  $\bar{y}_i$ , and  $\epsilon_i$  is random error having mean 0 and variance  $\sigma_i^2$ . Under the basic area-level model [1,2], we further assume that the  $\epsilon_i$  are normally distributed. Suppose we have some number  $h$  covariates from auxiliary data. Then we assume that each  $\theta_i$  is a linear function of the auxiliary covariate vector  $x_i = [x_{1,i}, \dots, x_{h,i}]'$  given by

$$\theta_i = x_i\beta + \nu_i$$

where  $\beta$  is a regression parameter vector of length  $h + 1$  and the  $\nu_i$  are normally distributed random errors, independent of the  $\epsilon_i$ , and having mean 0 and variance  $\sigma_\nu^2$ . Combining those equations gives

$$\bar{y}_i = x_i\beta + \nu_i + \epsilon_i$$

which is a mixed-effects linear regression model. The parameters  $\beta$  and  $\sigma_\nu^2$  are estimated conditional on the  $\sigma_i^2$ , which are provided as data. Typically, the  $\sigma_i^2$  are replaced by  $S_i^2$ , the direct estimate of sampling variance obtained from the survey, but Bayesian extensions enable modeling the  $\sigma_i^2$  [3]. The ‘‘Fay-Herriot’’ small-area estimates  $\hat{y}_i$  of  $\theta_i$  are given by the James-Stein shrinkage estimator

$$\hat{y}_i = \gamma_i \bar{y}_i + (1 - \gamma_i) x_i \hat{\beta}$$

where

$$\gamma_i = \frac{\hat{\sigma}_\nu^2}{\hat{\sigma}_\nu^2 + \sigma_i^2}$$

is the ratio of the model error variance to the total variance.

Note that each  $\hat{y}_i$  is a weighted sum of the corresponding direct estimate  $\bar{y}_i$  and the regression (synthetic) estimate  $x_i \hat{\beta}$ , and  $\hat{y}_i$  is shrunk from the domain estimate  $\bar{y}_i$  toward the synthetic estimate. The Fay-Herriot estimate

$\hat{y}_i$  is near  $\bar{y}_i$  for values of values of  $\hat{\sigma}_\nu^2$  that are large relative to  $\sigma_i^2$ , and near  $x_i\hat{\beta}$  where  $\hat{\sigma}_\nu^2$  is small relative to  $\sigma_i^2$ . That is, the direct domain estimates will dominate when their precision is high, and the synthetic estimates will dominate where the precision of the direct estimates is low relative to the model error variance. Equivalently, the area-level model will perform best where covariates are available which are strongly correlated with the direct domain estimates. By definition such covariates—originating from outside the survey—provide additional information about the unknown  $\theta_i$ .

The assumption of independently distributed model errors  $\nu_i$  can be relaxed by incorporating simultaneously autoregressive (SAR) spatial covariance structure [4], for which we assume  $\nu_i \sim N(\mathbf{0}, \mathbf{\Sigma})$ , where  $\mathbf{\Sigma}$  is the  $m \times m$  covariance matrix given by

$$\mathbf{\Sigma} = \sigma_\nu^2 [(\mathbf{I} - \rho\mathbf{W})(\mathbf{I} - \rho\mathbf{W}^T)]^{-1}$$

where  $\mathbf{I}$  is the  $m \times m$  identity matrix,  $\mathbf{W}$  is an  $m \times m$  row-standardized matrix having off-diagonal elements  $(i, j), i \neq j$  equal to  $1/k_i$  if district  $j$  is adjacent to district  $i$ , where  $k_i$  is the number of districts adjacent to  $i$ , and 0 otherwise, and  $\rho$  is the spatial autocorrelation parameter, which is estimated from the data.

Note that the SAR covariance structure is rather crude in that it is implemented at the area level, whereas stronger spatial correlations might exist at smaller spatial scales, and because it is based only upon whether or not pairs of areas are adjacent to each other rather than the distances between pairs of areas. For that reason, the SAR covariance structure is likely to provide useful information only where informative covariates are unavailable.

For our example, we set  $y_i = \text{logit}(p_i)$  and  $x_{1i} = \text{logit}(p_{ANCi})$  where the  $p_i$  are the direct domain estimates of district-level HIV prevalence proportions from the survey, and the  $p_{ANCi}$  are the prevalence proportions among pregnant women who obtained antenatal care services from clinics in district  $i$ . The logit transformation maps prevalence proportions to the real line and aids the normality assumption about the  $\nu_i$ . We also considered other covariates as described in the text. The variance of  $y_i = \text{logit}(p)$  was approximated by the Delta method and is given by

$$\text{Var}(\hat{y}_i) \cong \left( \frac{\theta_i}{1 - \theta_i} \right)^2 \text{Var}(p_i).$$

where the  $\text{Var}(p_i)$  are the variance estimates for the  $p_i$ .

Model fitting was performed using the sae package [5] for R [6].

## References

1. Fay RE, Herriot RA. Estimates of income for small places: An application of James-Stein procedures to census data. *Journal of the American Statistical Association*. 1979;74(366):269–277.
2. Rao JNK, Molina I. *Small Area Estimation*. 2nd ed. Wiley Series in Survey Methodology. New York: Wiley; 2015.
3. You Y, Chapman B. Small area estimation using area level models and estimated sampling variances. *Survey Methodology*. 2006;32(1):97–103.
4. Marhuenda Y, Molina I, Morales D. Small area estimation with spatio-temporal Fay-Herriot models. *Computational Statistics and Data Analysis*. 2013;58:308–325. doi:10.1016/j.csda.2012.09.002.
5. Molina I, Marhuenda Y. sae: An R Package for Small Area Estimation. *The R Journal*. 2015;7(1):81–98.
6. R Core Team. *R: A Language and Environment for Statistical Computing*; 2018. Available from: <http://www.R-project.org/>.
